# Supplementary material for: Interplay between Plasmodium falciparum haemozoin and l-arginine: implication for nitric oxide production
Source: Springer Nature journal article supplement (doi:10.1186/s12936-018-2602-0), 2018-12-01
Supplement: MOESM2 [file 16320236]

**Additional file 2\_Figure**

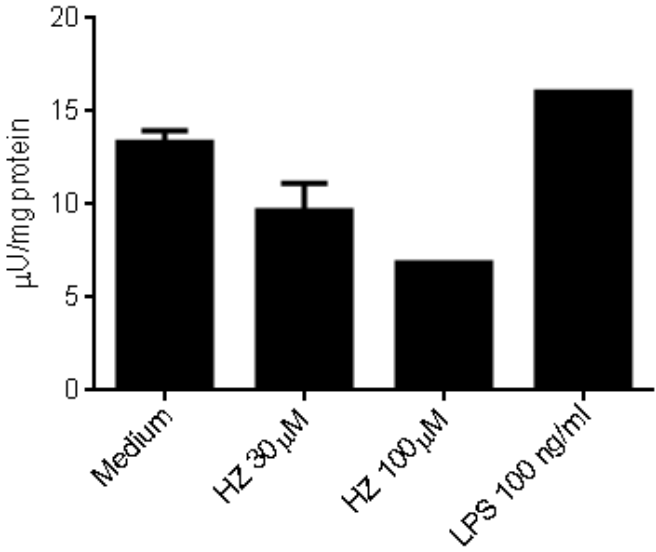

## **Additional file 2\_Legend**

Measurement of urea levels in BMDM treated with malarial hemozoin.

BMDM were seeded (24-well plates;  $2.5 \times 10^5$  cells/well, in 500  $\mu$ l of experiment medium) at 37°C under an atmosphere of 5% CO<sub>2</sub>, overnight. Cells were primed with 12.5 U/ml IFN- $\gamma$  for 2h, and then stimulated with different concentrations of HZ (30, 100  $\mu$ M), or LPS (200 ng/ml). After 24h incubation, the cells were washed with PBS and lysed in a cell lysis buffer (Cell Signaling Technology®). The concentration of protein of each sample was determined through Bradford reagent (Biorad®) <sup>2</sup>.

The cell lysate was incubated with 0,25 M L-Arg (pH 9,7) for 30 min at 37°C.

The reaction was stopped by adding an acid mixture (H<sub>2</sub>SO<sub>4</sub>-H<sub>3</sub>PO<sub>4</sub>-H<sub>2</sub>O, 1:3:7, vol/vol/vol). Arginase activity in the samples was reflected as the quantity of urea formed, which was expressed as the  $\mu$ mol of urea produced per min ( $\mu$ U) per milligram of protein. The urea levels were measured at 540 nm in a spectrophotometer (Synergy 4 microplate reader, Biotek, GE) <sup>3</sup>. Data shown as averages  $\pm$  SD of three independent experiments.
