# Supplementary material for: Interplay between Plasmodium falciparum haemozoin and l-arginine: implication for nitric oxide production
Source: Springer Nature journal article supplement (doi:10.1186/s12936-018-2602-0), 2018-12-01
Supplement: MOESM3 [file 16320236]

**Additional file 3\_Figure**

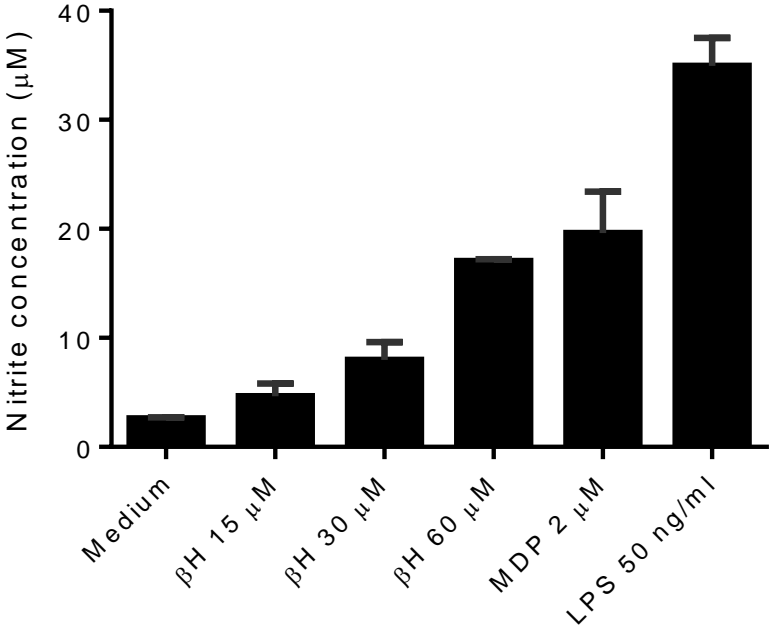

### **Additional file 3\_Legend**

Measurement of nitrite concentrations in BMDM treated with synthetic hemozoin.

Beta hemanin ( $\beta$ H, synthetic hemozoin) was prepared as described earlier <sup>4</sup>. BMDM were seeded (96-well plates;  $1 \times 10^5$  cells/well, in 100  $\mu$ l of experiment medium) and incubated at 37°C under an atmosphere of 5% CO<sub>2</sub>, overnight. Cells were primed for 2h with 12.5 U/ml IFN- $\gamma$ , stimulated with different concentrations of synthetic hemozoin ( $\beta$ H) (15, 30, 60  $\mu$ M), and MDP (2  $\mu$ g/ml) or LPS (50 ng/ml) as positive controls. After 24h, the levels of nitrite released into the supernatants were measured through Griess reaction. Results are reported as a mean of triplicate determinations  $\pm$  S.D. (error bars).
